# Supplementary figures and images for: LC-MS method for determining the activity of semicarbazide-sensitive amine oxidase in rodents
Source: Royal Society of Chemistry journal article supplement (doi:10.1039/c2ay05914b), 2012-01-01

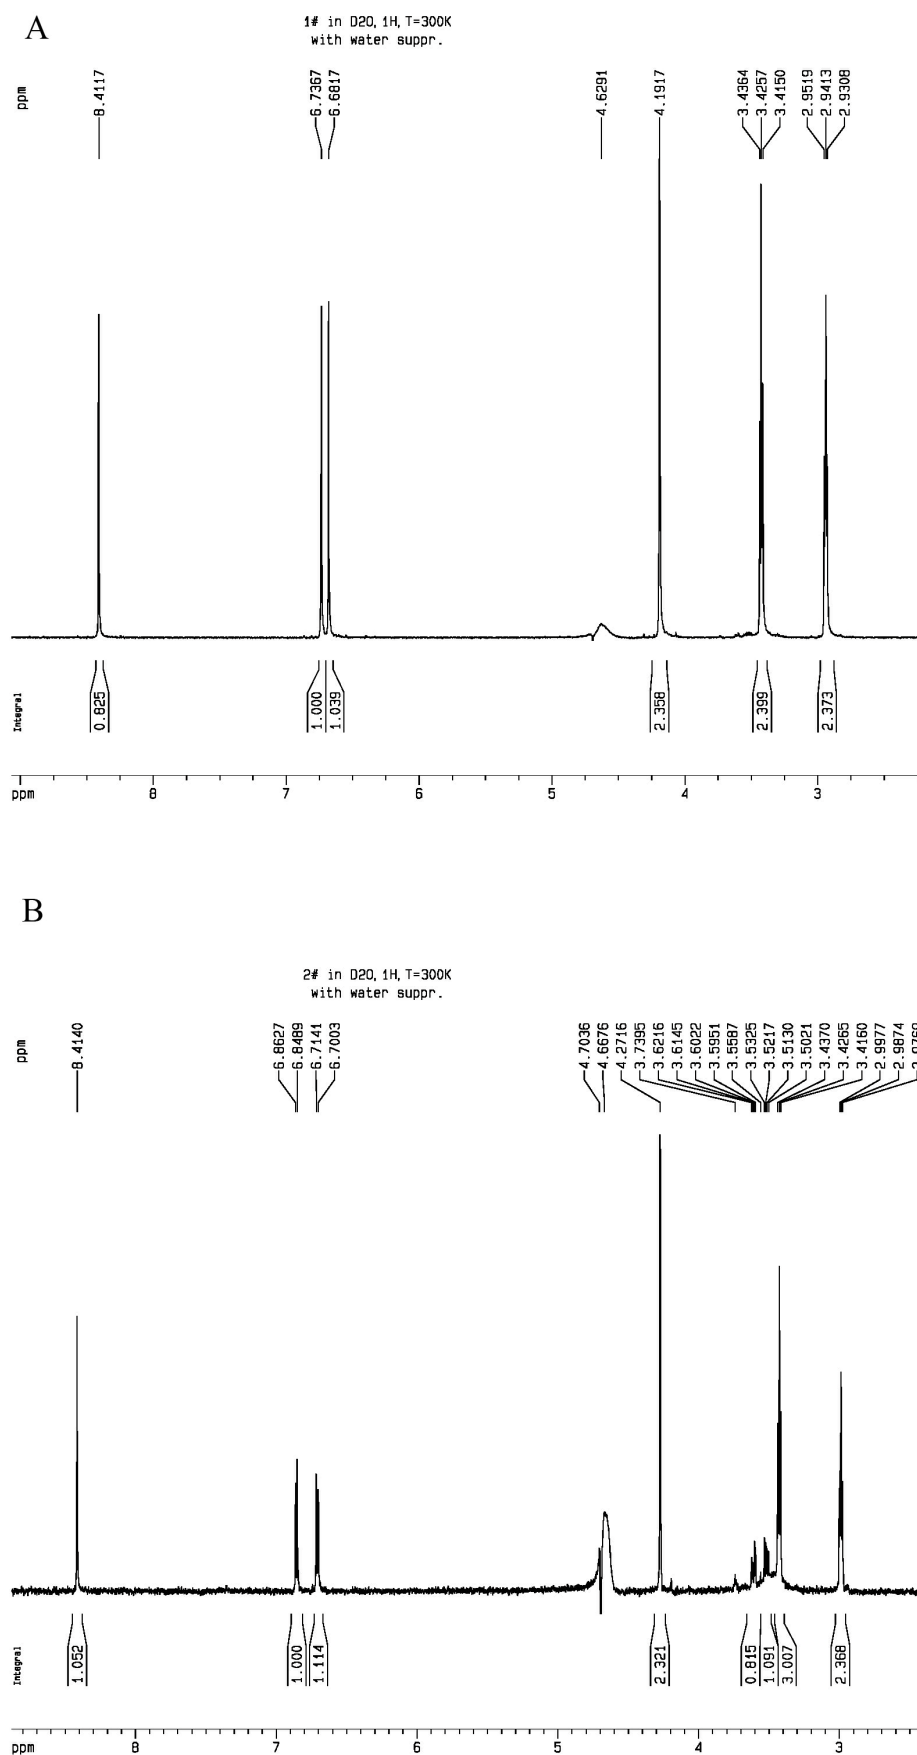

Figure S1

Supplement: c2ay05914b.pdf [file c2ay05914b.pdf]
